# Supplementary material for: Master Regulators of Oncogenic KRAS Response in Pancreatic Cancer: An Integrative Network Biology Analysis
Source: PubMed Central journal article supplement (PMC5283690; doi:10.1371/journal.pmed.1002223), 2017-01-31
Supplement: pmed.1002223.s015.pdf [file pmed.1002223.s015.pdf]

|                          |                           | <i>ICGC</i>        | <i>TCGA</i>     |
|--------------------------|---------------------------|--------------------|-----------------|
| Number of patients       |                           | 242                | 178             |
| Age at diagnosis (years) |                           | 67 (10.6)          | 65 (11)         |
| Gender                   | Female                    | 110 (45%)          | 80 (45%)        |
|                          | Male                      | 132 (55%)          | 97 (55%)        |
| Survival                 | Data available            | 240 (99%)          | 177 (99%)       |
|                          | Overall Survival (months) | 15 (9 to 25)       | 15 (9 to 22)    |
| Vital Status             | Alive                     | 94 (39%)           | 85 (48%)        |
|                          | Dead                      | 146 (61%)          | 92 (52%)        |
| Stage                    |                           | IA/IB: 3 (1%)      | IA/IB: 21 (12%) |
|                          |                           | T2: 3 (1%)         | IIA: 28 (16%)   |
|                          |                           | T3: 4 (2%)         | IIB: 118 (67%)  |
|                          |                           | Unknown: 230 (96%) | III/IV: 4 (2%)  |
|                          |                           |                    | IV: 4 (2%)      |
|                          |                           |                    | Unknown: 2 (1%) |
| Radiation Treatment      | Unknown                   | -                  | 32 (18%)        |
|                          | Yes                       | -                  | 101 (57%)       |
|                          | No                        | -                  | 44 (25%)        |
| Targeted Therapy         | Unknown                   | -                  | 89 (50%)        |
|                          | Yes                       | -                  | 46 (26%)        |
|                          | No                        | -                  | 42 (24%)        |
| Disease Processes        | Cell Cycle                | 90 (38%)           | 73 (41%)        |
|                          | Hedgehog/Wnt              | 37 (15%)           | 45 (25%)        |
|                          | Notch                     | 113 (47%)          | 59 (33%)        |

Table S2: Summary of clinical features in the ICGC and TCGA cohorts. Data are mean (SD), median (OQR), n (%) or n.
